# Supplementary material for: Guanine-based chemiluminescence resonance energy transfer biosensing platform for the specific assay of uracil-DNA glycosylase activity
Source: Royal Society of Chemistry journal article supplement (doi:10.1039/c6ay02964g), 2016-11-23
Supplement: c6ay02964g1.pdf [file c6ay02964g1.pdf]

Supporting Information

**Guanine–based chemiluminescence resonance energy transfer biosensing platform for detection of uracil-DNA glycosylase activity**

Jingjing Dong, Jinyu Lian, Yan Jin and Baoxin Li\*

Key Laboratory of Analytical Chemistry for Life Science of Shaanxi Province, School of Chemistry & Chemical Engineering, Shaanxi Normal University, Xi'an 710062, China

\*Fax: +86-29-81530727. E-mail: libaoxin@snnu.edu.cn.

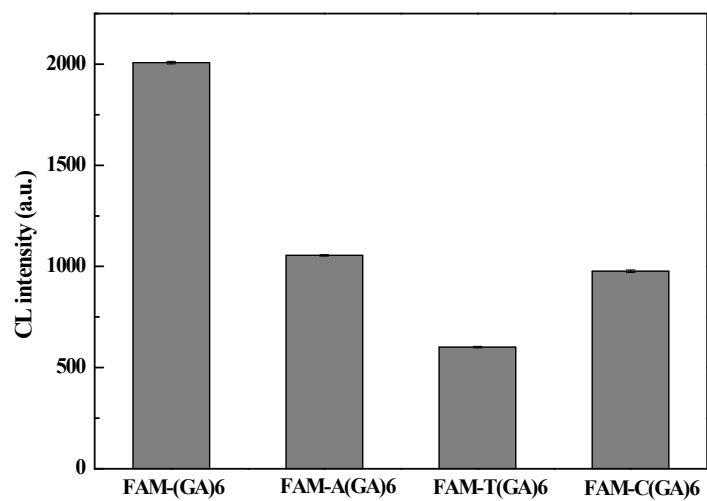

**Figure S1.** Effect of different labeling base for guanine CL sensing system.

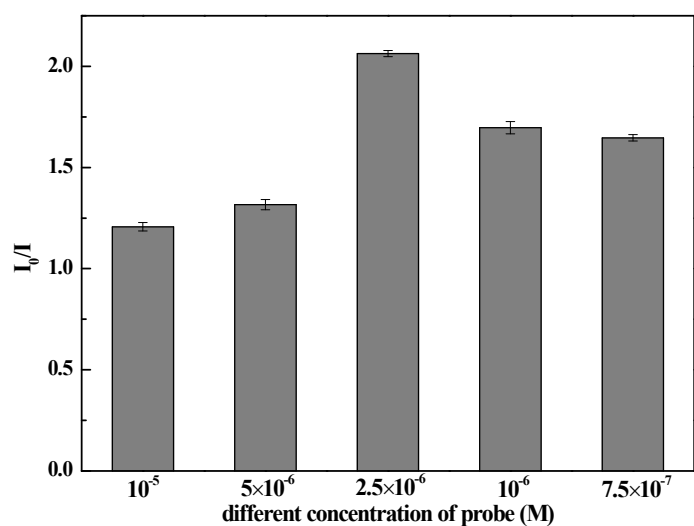

**Figure S2.** Effect of probe concentration on the CL response to UDG.

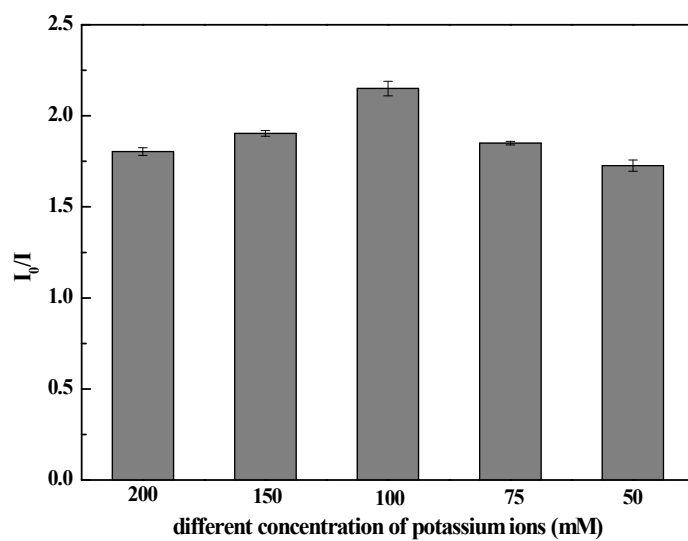

**Figure S3.** Effect of  $K^+$  concentration on the CL response to UDG.

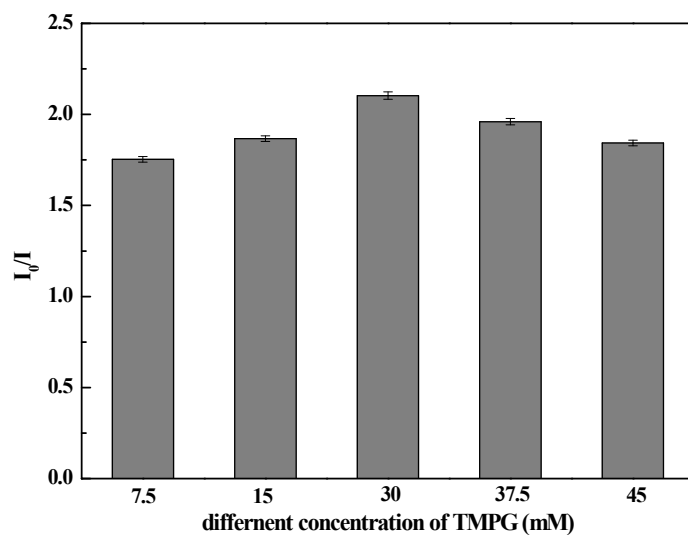

**Figure S4.** Effect of TMPG concentration on the CL response to UDG.

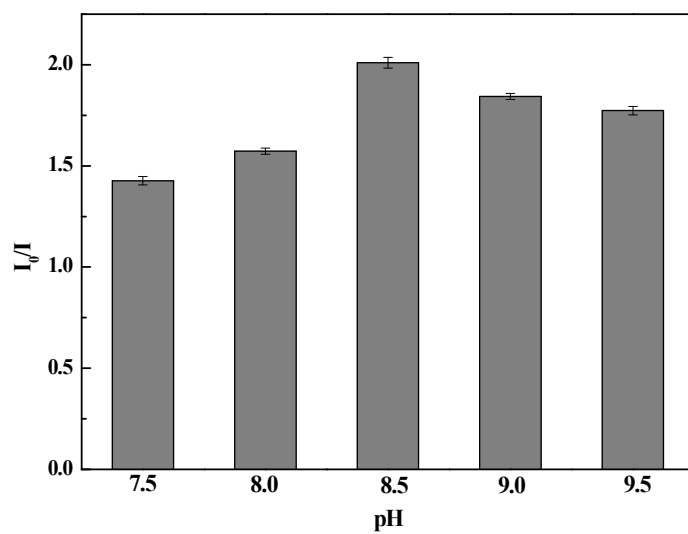

**Figure S5.** Effect of media pH on the CL response to UDG.

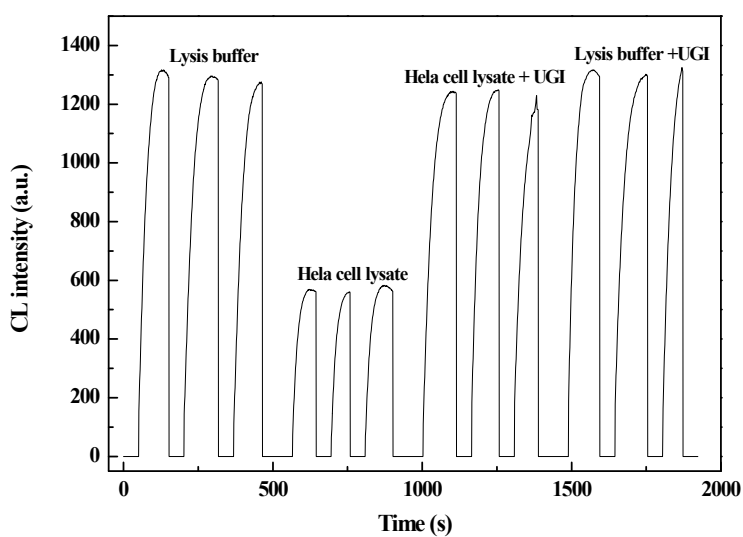

**Figure S6.** Qualitative detection of UDG in HeLa cells with this CL method.
